# Supplementary material for: Free Fatty Acids Differentially Downregulate Chemokines in Liver Sinusoidal Endothelial Cells: Insights into Non-Alcoholic Fatty Liver Disease
Source: PubMed Central journal article supplement (PMC4959750; doi:10.1371/journal.pone.0159217), 2016-07-25
Supplement: pone.0159217.s002.pdf [file pone.0159217.s002.pdf]

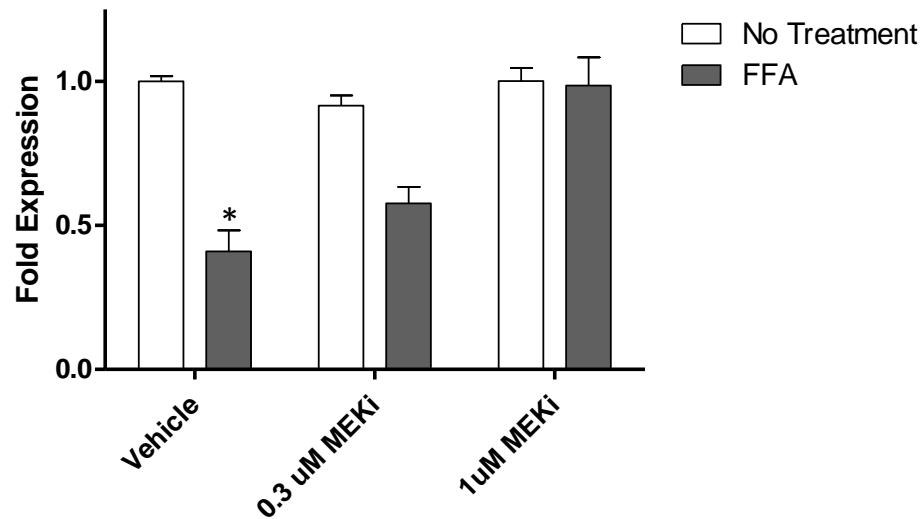

**S2 Fig. Downregulation of chemokines by FFAs is dependent on MAPK signaling.**

TSEC were treated with the indicated concentration of the MEK1/2 inhibitor (MEKi) for 1 hour. Cultures were then incubated with FFA for 18 hours and CCL2 gene expression was measured by quantitative PCR. Plots represent the mean +/- SE of triplicate experiments. \*p<0.05
